# Supplementary material for: Impact of horizontal resolution and model time step on European precipitation extremes in the OpenIFS 43r3 atmospheric model
Source: Copernicus journal article supplement (doi:10.5194/gmd-18-5435-2025), 2025-09-01
Supplement: Supplementary file 1 [file gmd-18-5435-2025-supplement.pdf]

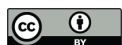

*Supplement of*

## **Impact of horizontal resolution and model time step on European precipitation extremes in the OpenIFS 43r3 atmospheric model**

**Yingxue Liu et al.**

*Correspondence to:* Yingxue Liu (yiliu@geomar.de)

The copyright of individual parts of the supplement might differ from the article licence.

# Supplementary Material

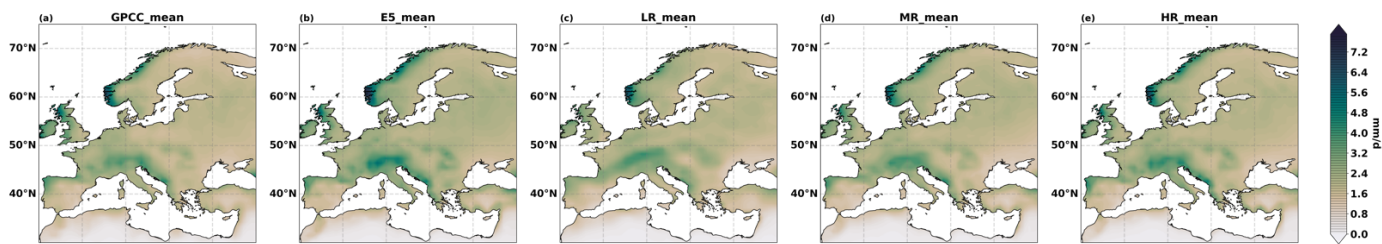

Fig. S1 Annual mean precipitation over Europe during 1982-2019 from (a) GPCC, (b) ERA5, (c) LR, (d) MR, (e) HR. Unit is mm/d.

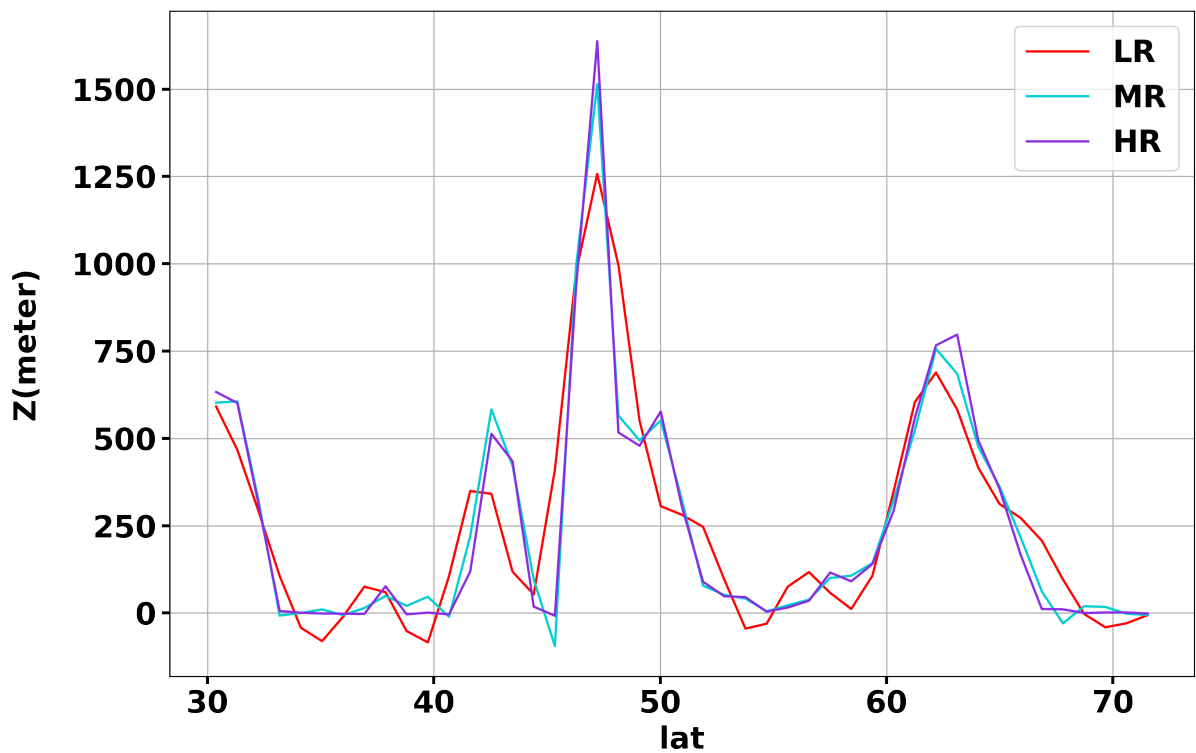

Fig. S2 The surface height (12.6° E, 30-72° N) in OpenIFS LR (red), MR (blue) and HR (purple). Unit is meter.

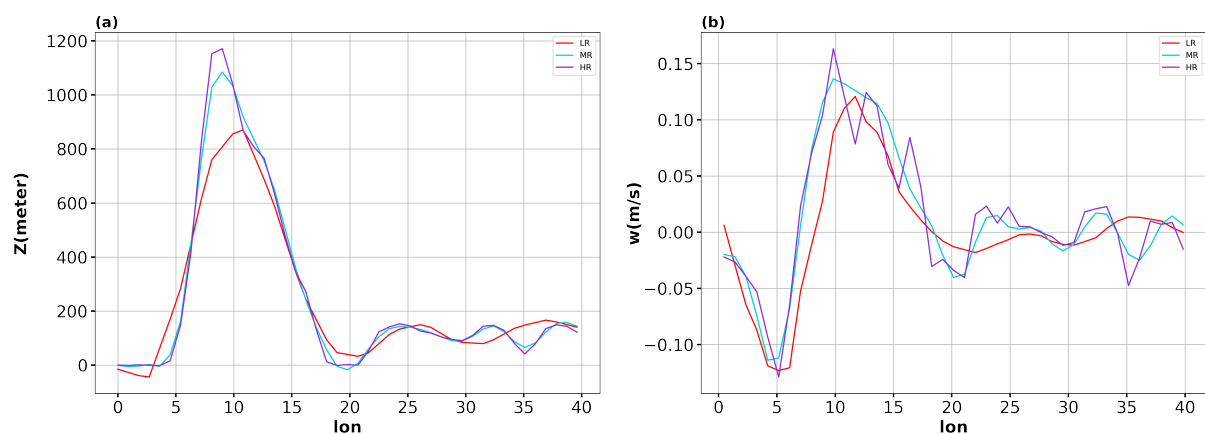

Fig. S3 The surface height (a) and annual mean vertical velocity (b) at 850 hPa over ( $0 - 40^\circ$  E,  $62^\circ$  N) in OpenIFS LR (red), MR (blue) and HR (purple). Unit is m/s.

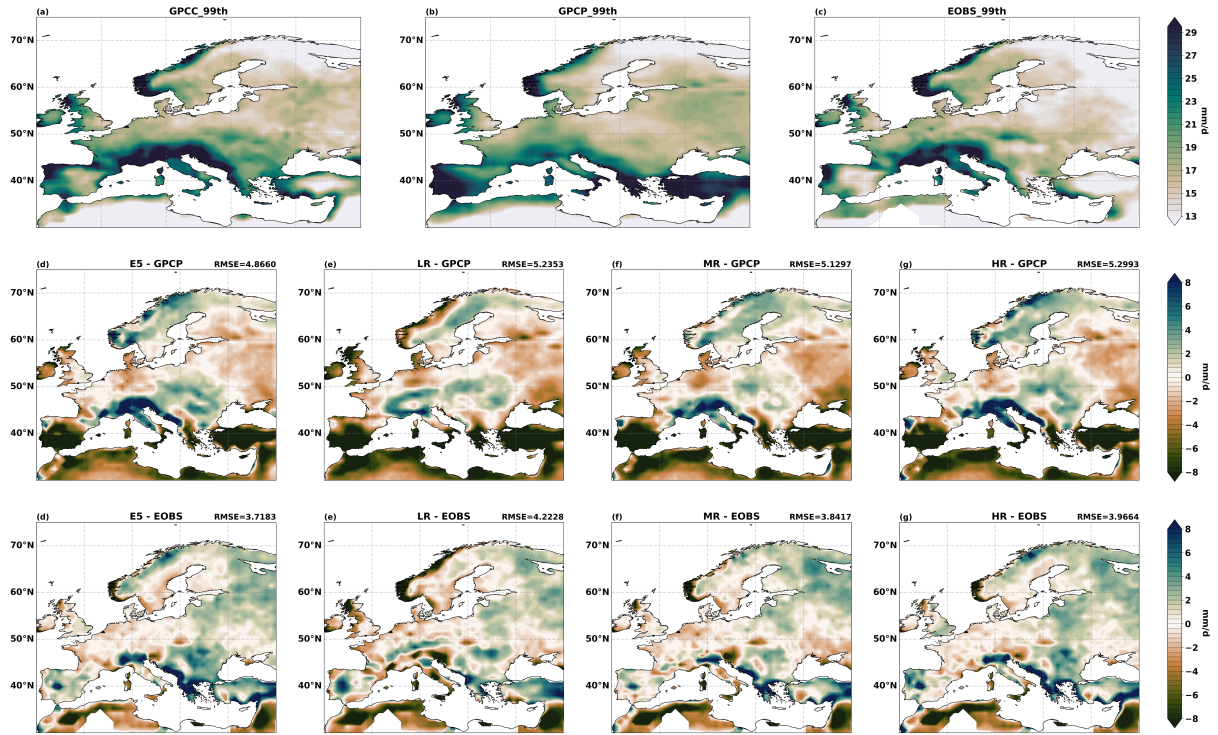

Fig. S4 The 99<sup>th</sup> percentile precipitation over Europe during 1982-2019 from (a) GPCC, (b) GPCP and (c) EOBS. Panels (d)-(g) are the biases between (d) ERA5, (e) HR, (f) MR, (g) HR and GPCP. Panels (h)-(k) are the same as panels (d)-(g) but for EOBS dataset.



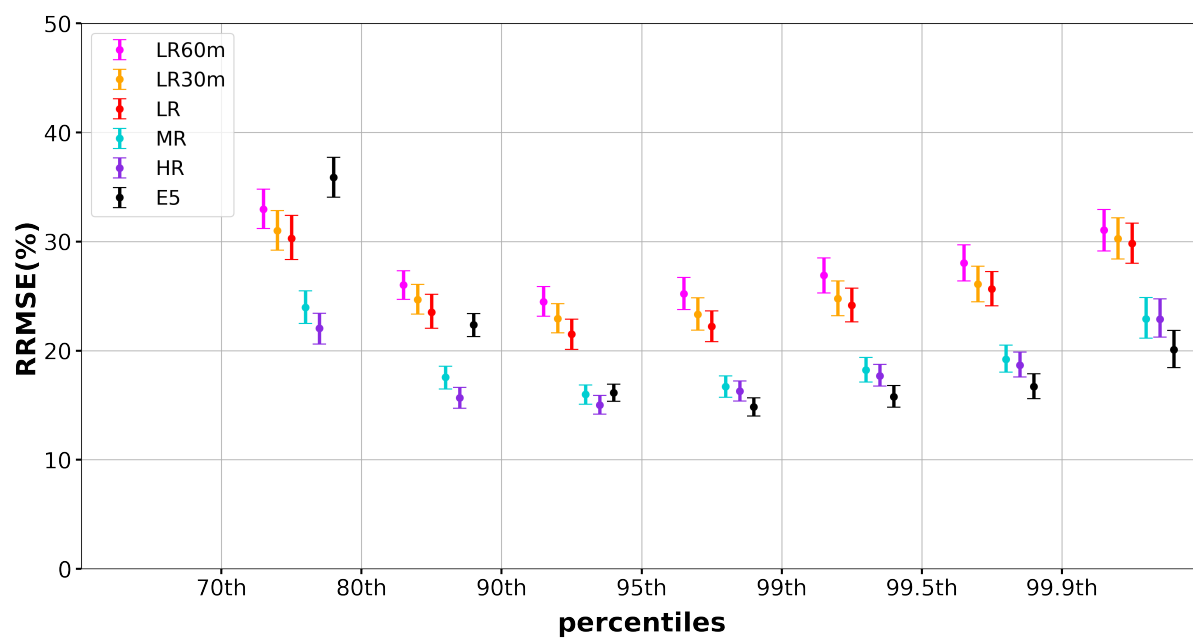

Fig. S5 Same as Fig. 5, but for relative RMSE (RRMSE).

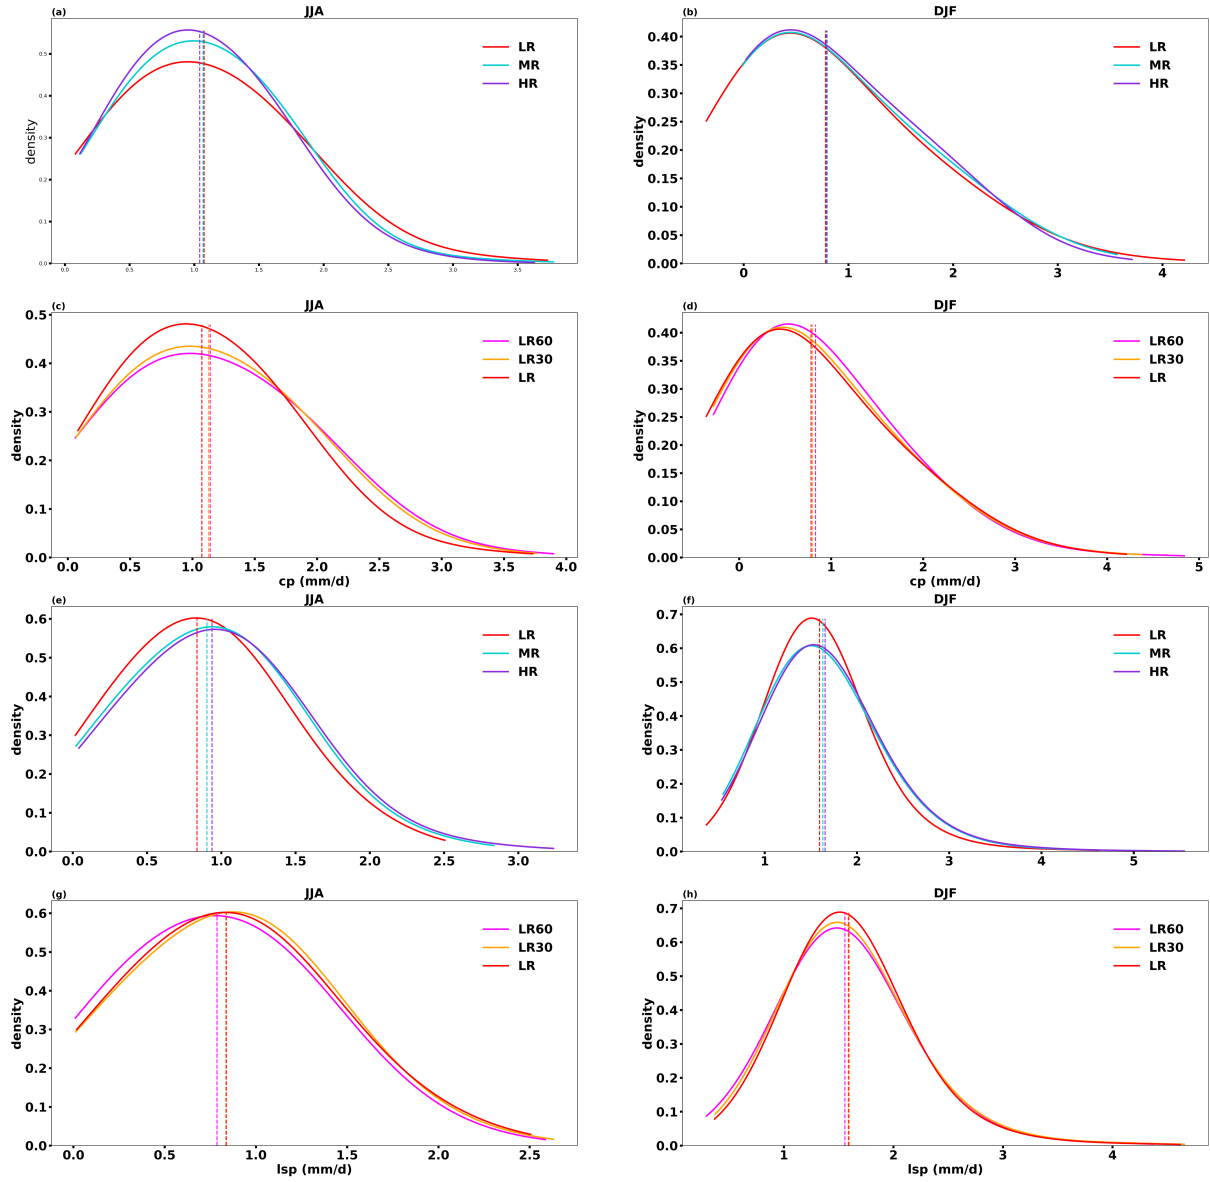

Fig. S6 European convective (a-d) and large-scale precipitation (e-h) distribution across different horizontal resolutions (a, b, e and f) and model time steps (c, d, g and h) in mean state in JJA and DJF (LR60m: magenta, LR30m: orange, LR: red, MR: blue, HR: purple). The time period is 1982-2019. The dash lines are the mean values of each distribution.

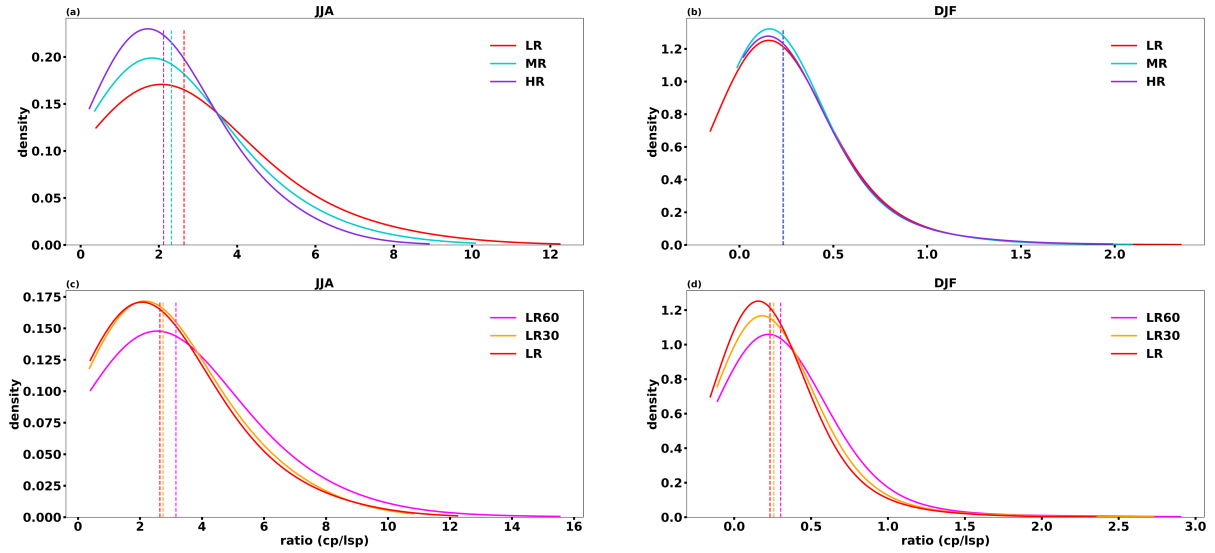

Fig. S7 The ratio between European convective and large-scale precipitation in mean state across different horizontal resolutions (a & b) and model time steps (c & d) in JJA and DJF (LR60m: magenta, LR30m: orange, LR: red, MR: blue, HR: purple). The dash lines are the mean values of each distribution.

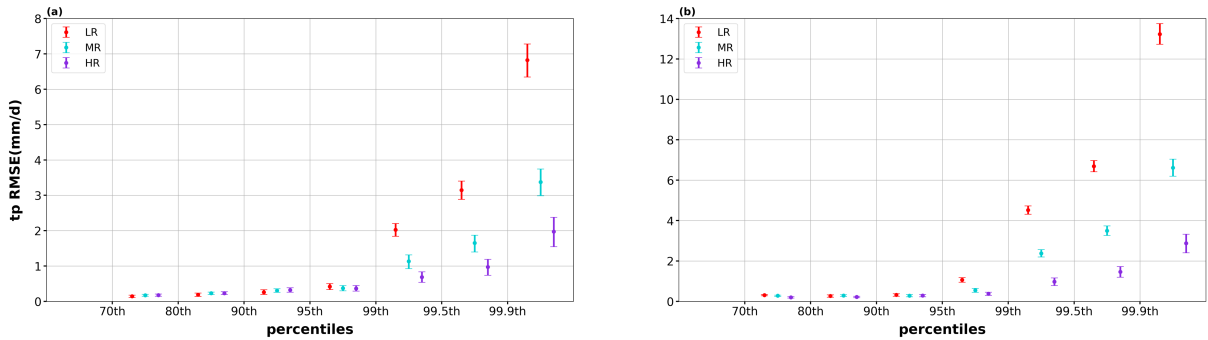

Fig. S8 RMSEs (referenced to GPCC) for annual Europe-averaged total precipitation at different percentile ranges (70<sup>th</sup> – 80<sup>th</sup>, 80<sup>th</sup> – 90<sup>th</sup>, 90<sup>th</sup> – 95<sup>th</sup>, 95<sup>th</sup> – 99<sup>th</sup>, 99<sup>th</sup> – 99.5<sup>th</sup>, 99.5<sup>th</sup> – 99.9<sup>th</sup> and >99.9<sup>th</sup> percentile) in OpenIFS simulations (LR: red, MR: blue, HR: purple) on (a) regridded and (b) native resolution. Dots are the RMSE values, and error bars are the 95 % CI.
